# Supplementary material
Source: PubMed Central journal article supplement (PMC3404356)
Supplement: supp_en.2012-1056_EN-12-1056Suppdata_7g.pdf [file supp_en.2012-1056_EN-12-1056Suppdata_7g.pdf]

Supplemental data 7g. Realtime PCR confirmed transcription factor expression changes.

| Gene symbol | Microarray |         | Realtime PCR |         |
|-------------|------------|---------|--------------|---------|
|             | Fold       | p value | Fold         | p value |
| Myc         | 4.9        | 0.002   | 7.5          | 1*E-4   |
| Sp1         | 2.1        | 0.004   | 1.6          | 0.04    |
| ATF1        | 2          | 0.005   | 2.3          | 0.05    |
| AP4S1       | 1.9        | 0.006   | 1.6          | 0.04    |
| CREB3       | 1.7        | 0.006   | 1.9          | 0.02    |
| USF1        | -1.3       | 0.002   | -2.4         | 0.001   |
| EST1        | -2.1       | 0.006   | -2.5         | 0.002   |
| CEBPD       | -6.5       | 0.001   | -3.9         | 0.001   |
